# Supplementary material for: Correlation ofA2bARandKLF4/KLF15with Obesity-Dyslipidemia Induced Inflammation in Uygur Population
Source: Hindawi journal article supplement (doi:10.1155/2016/7015620), 2016-01-01
Supplement: f1 [file 7015620.f1.pdf]

The detection rate of total dyslipidemia was 61.05%, and showed a trend of increasing with age; The detection rate of high blood TC was 14.53%, and showed a trend of increasing with age; The detection rate of high blood TG was 22.67%, of which detection rate was decreasing with the age in male, while the detection rate revealed an increasing trend in female ;The detection rate of low HDL-C was 42.44%; The detection rate of high LDL-C was 3.49% .

**Table S1 The comparison of the main indexes among the ethnic groups**

| Detection rate     | Age   | Male(n,%)    | Female(n,%)  | Tota;(n,%)     |
|--------------------|-------|--------------|--------------|----------------|
| Total dyslipidemia | 20-44 | 50.98(26/51) | 58.82(30/51) | 54.90(56/102)  |
|                    | 45-59 | 62.96(17/27) | 66.67(14/21) | 64.58(31/48)   |
|                    | 60-90 | 80.00(12/15) | 85.71(6/7)   | 81.82(18/22)   |
| High TC            | 20-90 | 59.14(55/93) | 63.29(50/79) | 61.05(105/172) |
|                    | 20-44 | 7.84(4/51)   | 13.73(7/51)  | 10.78(11/102)  |
|                    | 45-59 | 7.40(2/27)   | 23.81(5/21)  | 14.58(7/48)    |
|                    | 60-90 | 26.67(4/15)  | 42.86(3/7)   | 31.82(7/22)    |
| High TG            | 20-90 | 10.75(10/93) | 18.99(15/79) | 14.53(25/172)  |
|                    | 20-44 | 27.45(14/51) | 15.69(8/51)  | 21.57(22/102)  |
|                    | 45-59 | 25.93(7/27)  | 19.05(4/21)  | 22.92(11/48)   |
|                    | 60-90 | 13.33(2/15)  | 57.14(4/7)   | 27.27(6/22)    |
| Low HDL-C          | 20-90 | 24.73(23/93) | 20.25(16/79) | 22.67(39/172)  |
|                    | 20-44 | 33.33(17/51) | 47.06(24/51) | 40.20(41/102)  |
|                    | 45-59 | 48.14(13/27) | 42.86(9/21)  | 45.83(22/48)   |
|                    | 60-90 | 46.67(7/15)  | 42.85(3/7)   | 45.45(10/22)   |
| High LDL-C         | 20-90 | 39.78(37/93) | 45.56(36/79) | 42.44(73/172)  |
|                    | 20-44 | 3.92(2/51)   | 3.92(2/51)   | 3.92(4/102)    |
|                    | 45-59 | 3.70(1/27)   | 0(0/21)      | 2.08(1/48)     |
|                    | 60-90 | 0(0/15)      | 1.43(1/7)    | 4.55(1/22)     |
|                    | 20-90 | 3.23(3/93)   | 3.80(3/79)   | 3.49(6/172)    |

TG: Triglycerides; TC: Cholesterol; HDL: High density lipoproteins; LDL: Low density lipoproteins. Han (n=600); Uyгур (n=172); Kazak (n=630). Comparison between groups was used *t* test. Values are given as the mean±SD. *P*<0.01, the difference was statistically significant.

The detection rate of total dyslipidemia in Han, Uyгур and Kazak population was respectively 22.22%, 61.05% and 15.08%. The detection rate of total dyslipidemia was significantly higher in Uyгур population than Han and Kazak population ( $P<0.01$ ). The results were shown in the Table S2.

**Table S2 The detection rate of dyslipidemia in Han, Uyгур and Kazak population**

| <b>Ethnics</b>          | <b>Age</b> | <b>Male(n,%)</b>  | <b>Female(n,%)</b> | <b>Total(n,%)</b> |
|-------------------------|------------|-------------------|--------------------|-------------------|
| Han                     | 20-44      | 32.05( 83/259)    | 9.03(43/476)       | 17.14(126/735)    |
|                         | 45-59      | 38.99(62/159)     | 22.03(65/295)      | 27.97(127/454)    |
|                         | 60-90      | 27.66(26/94)      | 30.26(23/76)       | 28.82(49/170)     |
|                         | 20-90      | 33.40(171/512) *# | 15.47(131/847) *#  | 22.22(302/1359) # |
| Uyгур                   | 20-44      | 50.98(26/51)      | 58.82(30/51)       | 54.90(56/102)     |
|                         | 45-59      | 62.96(17/27)      | 66.67(14/21)       | 64.58(31/48)      |
|                         | 60-90      | 80.00(12/15)      | 85.71(6/7)         | 81.82(18/22)      |
|                         | 20-90      | 59.14(55/93) #    | 63.29(50/79) #     | 61.05(105/172) #  |
| Kazak                   | 20-44      | 13.21(14/106)     | 6.91(17/246)       | 8.81(31/352)      |
|                         | 45-59      | 26.09(18/69)      | 21.93(25/114)      | 23.50(43/183)     |
|                         | 60-90      | 19.51(8/41)       | 24.07(13/54)       | 22.11(21/95)      |
|                         | 20-90      | 18.52(40/216) #   | 13.29(55/414) #    | 15.08(95/630) #   |
| Han, Uyгур<br>and Kazak | 20-44      | 29.57(123/416)    | 11.64(90/773)      | 17.91(213/1189)   |
|                         | 45-59      | 38.04(97/255)     | 24.19(104/430)     | 29.34(201/685)    |
|                         | 60-90      | 30.67(46/150)     | 30.66(42/137)      | 30.66(88/287)     |
|                         | 20-90      | 32.40(266/821) *  | 17.61(236/1340) *  | 23.23(502/2161)   |

\*  $P<0.01$ , intra-group comparison; # $P<0.01$ , Comparison among various ethnic groups. The difference was statistically significant.

The detection rate of high TC in Han, Uyгур and Kazak population was respectively 6.03%, 14.53% and 11.90%. The detection rate of high TC was significantly higher in Uyгур population than Han and Kazak population ( $P<0.01$ ). The results were shown in the Table S3.

**Table S3 The detection rate of high TC in Han, Uyгур and Kazak population**

| <b>Ethnics</b>          | <b>Age</b> | <b>Male(n,%)</b>           | <b>Female(n,%)</b>         | <b>Total(n,%)</b>          |
|-------------------------|------------|----------------------------|----------------------------|----------------------------|
| Han                     | 20-44      | 4.63(12/259)               | 2.52(12/476)               | 3.27(24/735)               |
|                         | 45-59      | 10.69(17/159)              | 7.80(23/295)               | 8.81(40/454)               |
|                         | 60-90      | 6.38(6/94)                 | 15.78(12/76)               | 10.59(18/170)              |
|                         | 20-90      | 6.83(35/512) <sup>#</sup>  | 5.55(47/847) <sup>#</sup>  | 6.03(82/1359) <sup>#</sup> |
| Uyгур                   | 20-44      | 7.84(4/51)                 | 13.73(7/51)                | 10.78(11/102)              |
|                         | 45-59      | 7.40(2/27)                 | 23.81(5/21)                | 14.58(7/48)                |
|                         | 60-90      | 26.67(4/15)                | 42.86(3/7)                 | 31.82(7/22)                |
|                         | 20-90      | 10.75(10/93) <sup>#</sup>  | 18.99(15/79) <sup>#</sup>  | 14.53(25/172) <sup>#</sup> |
| Kazak                   | 20-44      | 8.49(9/106)                | 3.66(9/246)                | 5.11(18/352)               |
|                         | 45-59      | 23.19(16/69)               | 20.18(23/114)              | 21.31(39/183)              |
|                         | 60-90      | 19.51(8/41)                | 18.52(10/54)               | 18.95(18/95)               |
|                         | 20-90      | 15.28(33/216) <sup>#</sup> | 10.15(42/414) <sup>#</sup> | 11.90(75/630) <sup>#</sup> |
| Han, Uyгур<br>and Kazak | 20-44      | 6.01(25/416)               | 3.62(28/773)               | 4.46(53/1189)              |
|                         | 45-59      | 13.73(35/255)              | 11.86(51/430)              | 12.55(86/685)              |
|                         | 60-90      | 12.0(18/150)               | 18.25(25/137)              | 14.98(43/287)              |
|                         | 20-90      | 9.50(78/821)               | 7.76(104/1340)             | 8.42(182/2161)             |

<sup>#</sup> $P<0.01$ , Comparison among various ethnic groups. The difference was statistically significant.

The detection rate of high TG in Han, Uyгур and Kazak population was respectively 12.36%, 22.67% and 3.02%. The detection rate of high TG was significantly higher in Uyгур population than Han and Kazak population ( $P<0.01$ ). The results were shown in the Table S4.

**Table S4 The detection rate of high TG in Han, Uyгур and Kazak population**

| <b>Ethnics</b>          | <b>Age</b> | <b>Male(n,%)</b> | <b>Female(n,%)</b> | <b>Total(n,%)</b> |
|-------------------------|------------|------------------|--------------------|-------------------|
| Han                     | 20-44      | 16.60(43/259)    | 3.99(19/476)       | 8.44(62/735)      |
|                         | 45-59      | 25.16(40/159)    | 12.88(38/295)      | 17.18(78/454)     |
|                         | 60-90      | 15.96(15/94)     | 17.11(13/76)       | 16.47(28/170)     |
|                         | 20-90      | 19.14(98/512) *# | 8.26(70/847) *#    | 12.36(168/1359) # |
| Uyгур                   | 20-44      | 27.45(14/51)     | 15.69(8/51)        | 21.57(22/102)     |
|                         | 45-59      | 25.93(7/27)      | 19.05(4/21)        | 22.92(11/48)      |
|                         | 60-90      | 13.33(2/15)      | 57.14(4/7)         | 27.27(6/22)       |
|                         | 20-90      | 24.73(23/93) #   | 20.25(16/79) #     | 22.67(39/172) #   |
| Kazak                   | 20-44      | 6.60(7/106)      | 1.63(4/246)        | 3.13(11/352)      |
|                         | 45-59      | 4.35(3/69)       | 1.75(2/114)        | 2.73(5/183)       |
|                         | 60-90      | 0(0/41)          | 5.56(3/54)         | 3.16(3/95)        |
|                         | 20-90      | 4.63(10/216) #   | 2.17(9/414) #      | 3.02(19/630) #    |
| Han, Uyгур<br>and Kazak | 20-44      | 15.38(64/416)    | 4.01(31/773)       | 7.99(95/1189)     |
|                         | 45-59      | 19.61(50/255)    | 10.23(44/430)      | 13.72(94/685)     |
|                         | 60-90      | 11.33(17/150)    | 14.60(20/137)      | 12.89(37/287)     |
|                         | 20-90      | 15.96(131/821) * | 7.10(95/1340) *    | 10.46(226/2161)   |

\*  $P<0.01$ , intra-group comparison; # $P<0.01$ , Comparison among various ethnic groups. The difference was statistically significant.

The detection rate of low HDL-C in Han, Uyгур and Kazak population was respectively 6.11%, 42.44% and 0.63%. The detection rate of low HDL-C was significantly higher in Uyгур population than Han and Kazak population ( $P<0.01$ ). The results were shown in the Table S5.

**Table S5 The detection rate of low HDL-C in Han,Uyгур and Kazak population**

| <b>Ethnics</b>          | <b>Age</b> | <b>Male(n,%)</b> | <b>Female(n,%)</b> | <b>Total(n,%)</b> |
|-------------------------|------------|------------------|--------------------|-------------------|
| Han                     | 20-44      | 13.13(34/259)    | 9.66(16/476)       | 6.80(50/735)      |
|                         | 45-59      | 10.06(16/159)    | 2.37(7/295)        | 5.07(23/454)      |
|                         | 60-90      | 7.45(7/94)       | 3.95(3/76)         | 5.88(10/170)      |
|                         | 20-90      | 11.13(57/512) *# | 3.07(26/847) *#    | 6.11(83/1359) #   |
| Uyгур                   | 20-44      | 33.33(17/51)     | 47.06(24/51)       | 40.20(41/102)     |
|                         | 45-59      | 48.14(13/27)     | 42.86(9/21)        | 45.83(22/48)      |
|                         | 60-90      | 46.67(7/15)      | 42.85(3/7)         | 45.45(10/22)      |
|                         | 20-90      | 39.78(37/93) #   | 45.56(36/79) #     | 42.44(73/172) #   |
| Kazak                   | 20-44      | 0(0/109)         | 1.63(4/246)        | 1.14(4/352)       |
|                         | 45-59      | 0(0/69)          | 0(0/114)           | 0(0/183)          |
|                         | 60-90      | 0(0/41)          | 0(0/54)            | 0(0/95)           |
|                         | 20-90      | 0(0/216) #       | 0.97(4/414) #      | 0.63(4/630) #     |
| Han, Uyгур<br>and Kazak | 20-44      | 12.26(51/416)    | 5.69(44/773)       | 7.99(95/1189)     |
|                         | 45-59      | 11.37(29/255)    | 3.72(16/430)       | 6.57(45/685)      |
|                         | 60-90      | 9.33(14/150)     | 4.38(6/137)        | 6.97(20/287)      |
|                         | 20-90      | 11.45(94/821) *  | 4.93(66/1340) *    | 7.40(160/2161)    |

\*  $P<0.01$ , intra-group comparison; # $P<0.01$ , Comparison among various ethnic groups. The difference was statistically significant.

The detection rate of high LDL-C in Han, Uygur and Kazak population was respectively 5.30%, 3.49% and 5.71%, and the difference was not significant. The results were shown in the Table S6.

**Table S6 The detection rate of high LDL-C in Han,Uygur and Kazak participants**

| <b>Ethnics</b>          | <b>Age</b> | <b>Male(n,%)</b> | <b>Female(n,%)</b> | <b>Total(n,%)</b> |
|-------------------------|------------|------------------|--------------------|-------------------|
| Han                     | 20-44      | 6.17(16/259)     | 1.26(6/476)        | 2.99(22/735)      |
|                         | 45-59      | 13.21(21/159)    | 6.10(18/295)       | 8.59(39/454)      |
|                         | 60-90      | 3.19(3/94)       | 10.53(8/76)        | 6.47(11/170)      |
|                         | 20-90      | 7.81(40/512) *   | 3.78(32/847) *     | 5.30(72/1359)     |
| Uygur                   | 20-44      | 3.92(2/51)       | 3.92(2/51)         | 3.92(4/102)       |
|                         | 45-59      | 3.70(1/27)       | 0(0/21)            | 2.08(1/48)        |
|                         | 60-90      | 0(0/15)          | 1.43(1/7)          | 4.55(1/22)        |
|                         | 20-90      | 3.23(3/93)       | 3.80(3/79)         | 3.49(6/172)       |
| Kazak                   | 20-44      | 1.89(2/106)      | 2.03(5/246)        | 1.99(7/352)       |
|                         | 45-59      | 13.04(9/69)      | 8.77(10/114)       | 10.38(19/183)     |
|                         | 60-90      | 9.76(4/41)       | 11.11(6/54)        | 10.53(10/95)      |
|                         | 20-90      | 6.94(15/216)     | 5.07(21/414)       | 5.71(36/630)      |
| Han, Uygur<br>and Kazak | 20-44      | 4.81(20/416)     | 1.68(13/773)       | 2.76(33/1189)     |
|                         | 45-59      | 12.16(31/255)    | 6.51(28/430)       | 8.61(59/685)      |
|                         | 60-90      | 4.67(7/150)      | 10.95(15/137)      | 7.67(22/287)      |
|                         | 20-90      | 7.06(58/821) *   | 4.18(56/1340) *    | 5.28(114/2161)    |

\*  $P < 0.01$ , intra-group comparison; # $P < 0.01$ , Comparison among various ethnic groups. The difference was statistically significant.

In the Han ethnic group, the microarray analysis results indicated that compared with the normal group, the obesity group had 3 genes (i.e., *ITGB1*, *ITGA7*, *CCND1*) that were significantly up expressed, and 3 genes (i.e., *MYC*, *CXCR34*, *ALDH1A23*) that were significantly down expressed. Within the Uygur ethnic group, the obesity group had 10 genes (i.e., *KLF4*, *KLF15*, *PIK3CD*, *MYD88*, *RAC2*, *JAK3*, *CCR1*, *CXCR2*, *PPKCB*, *VCAM1*) that were significantly down expressed. Within the Kazak ethnic group, the obesity group had 2 genes (i.e., *PLA2G2D*, *UGT2A1*) that were significantly under expressed. The results were shown in the Figure S1 and Table S1.

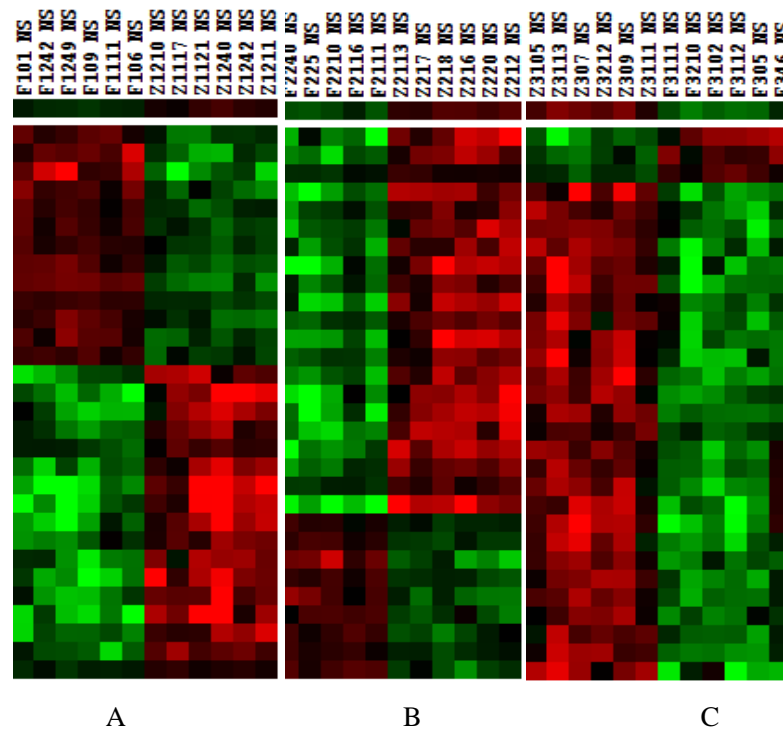

Figure S1 Differential expression gene in different ethnic group.

A. Han ethnic group; B. Uygur ethnic group; C. Kazak ethnic group

Table S7 Differentially expressed genes among the Han, Uygur and Kazaks ethnic group

|                          | Han                                                        |                                                         | Uygur |                                                                                                                                                                                      | Kazak |                                       |
|--------------------------|------------------------------------------------------------|---------------------------------------------------------|-------|--------------------------------------------------------------------------------------------------------------------------------------------------------------------------------------|-------|---------------------------------------|
|                          | Up                                                         | Down                                                    | Up    | Down                                                                                                                                                                                 | Up    | Down                                  |
| <b>Obesity VS Normal</b> | <i>ITGB1</i> (9),<br><i>ITGA7</i> (8),<br><i>CCND1</i> (4) | <i>MYC</i> (5), <i>CXCR3</i> (4),<br><i>ALDH1A2</i> (3) | /     | <i>KLF4</i> (10), <i>KLF15</i> (9), <i>PIK3CD</i> (10), <i>MYD88</i> (8), <i>RAC2</i> (7), <i>JAK3</i> (7),<br><i>CCR1</i> (7), <i>CXCR2</i> (7), <i>PPKCB</i> (7), <i>VCAM1</i> (6) | /     | <i>PLA2G2D</i> (4), <i>UGT2A1</i> (3) |

The brackets indicate the fold change (in multiples) of the differently expressed genes.

The weight, BMI, WC, HC, WHR, Fasting blood-glucose, Fasting Insulin, TG and TC in the Uygur population were significantly higher than those in the Han and Kazak groups ( $P<0.01$ ). The HDL in the Uygur population was significantly lower than that in the Han and Kazak ( $P<0.01$ ). The LDL in the Uygur population was significantly lower than Han, while higher than Kazak ( $P<0.01$ ). The results were shown in the Table S7.

**Table S8 The comparison of the main indexes among the ethnic groups**

| Indexes                     | Ethnics | n   | Mean   | SD    | 95% CI |        | F       | P     |
|-----------------------------|---------|-----|--------|-------|--------|--------|---------|-------|
|                             |         |     |        |       | Lower  | Upper  |         |       |
| Height<br>(cm)              | Han     | 600 | 162.58 | 7.49  | 161.98 | 163.18 | 4.011   | 0.018 |
|                             | Uygur   | 172 | 160.49 | 8.28  | 159.24 | 161.74 |         |       |
|                             | Kazak   | 630 | 161.70 | 10.32 | 160.89 | 162.51 |         |       |
| Weight<br>(kg)              | Han     | 600 | 64.06  | 11.00 | 63.18  | 64.94  | 102.318 | 0.000 |
|                             | Uygur   | 172 | 79.39  | 9.73  | 77.92  | 80.85  |         |       |
|                             | Kazak   | 630 | 68.24  | 14.23 | 67.13  | 69.35  |         |       |
| BMI<br>(Kg/M <sup>2</sup> ) | Han     | 600 | 24.14  | 3.13  | 23.89  | 24.39  | 198.255 | 0.000 |
|                             | Uygur   | 172 | 30.77  | 2.59  | 30.38  | 31.16  |         |       |
|                             | Kazak   | 630 | 25.95  | 4.70  | 25.58  | 26.32  |         |       |
| WC<br>(cm)                  | Han     | 600 | 81.65  | 9.92  | 80.85  | 82.44  | 166.415 | 0.000 |
|                             | Uygur   | 172 | 99.43  | 8.35  | 98.18  | 100.69 |         |       |
|                             | Kazak   | 630 | 84.67  | 13.12 | 83.64  | 85.69  |         |       |
| HC<br>(cm)                  | Han     | 600 | 94.99  | 6.51  | 94.46  | 95.51  | 166.793 | 0.000 |
|                             | Uygur   | 172 | 107.59 | 7.07  | 106.53 | 108.66 |         |       |
|                             | Kazak   | 630 | 98.91  | 9.52  | 98.17  | 99.66  |         |       |
| WHR                         | Han     | 600 | 0.86   | 0.09  | 0.85   | 0.87   | 50.204  | 0.000 |
|                             | Uygur   | 171 | 0.92   | 0.06  | 0.92   | 0.93   |         |       |
|                             | Kazakh  | 630 | 0.85   | 0.08  | 0.85   | 0.86   |         |       |
| SBP<br>(mmHg)               | Han     | 600 | 120.26 | 15.56 | 119.01 | 121.50 | 22.550  | 0.000 |
|                             | Uygur   | 165 | 120.58 | 20.64 | 117.41 | 123.75 |         |       |
|                             | Kazak   | 630 | 127.50 | 23.02 | 125.69 | 129.30 |         |       |



|                        |              |     |       |       |       |       |         |       |
|------------------------|--------------|-----|-------|-------|-------|-------|---------|-------|
| <b>DBP</b>             | <b>Han</b>   | 600 | 74.81 | 10.78 | 73.94 | 75.67 | 91.297  | 0.000 |
| <b>(mmHg)</b>          | <b>Uygur</b> | 165 | 78.81 | 13.17 | 76.78 | 80.83 |         |       |
|                        | <b>Kazak</b> | 630 | 84.77 | 14.70 | 83.62 | 85.92 |         |       |
| <b>Fasting</b>         | <b>Han</b>   | 600 | 5.79  | 1.36  | 5.68  | 5.90  | 121.381 | 0.000 |
| <b>blood-glucose</b>   | <b>Uygur</b> | 172 | 6.05  | 1.09  | 5.89  | 6.21  |         |       |
| <b>(mmol/L)</b>        | <b>Kazak</b> | 630 | 4.84  | 1.11  | 4.75  | 4.92  |         |       |
| <b>2 hour</b>          | <b>Han</b>   | 600 | 7.74  | 3.84  | 7.43  | 8.05  | 62.599  | 0.000 |
| <b>blood-glucose</b>   | <b>Uygur</b> | 172 | 6.58  | 2.33  | 6.23  | 6.93  |         |       |
| <b>(mmol/L)</b>        | <b>Kazak</b> | 630 | 5.81  | 2.23  | 5.63  | 5.98  |         |       |
| <b>Fasting Insulin</b> | <b>Han</b>   | 599 | 10.52 | 10.36 | 9.69  | 11.36 | 16.890  | 0.000 |
| <b>(mmol/L)</b>        | <b>Uygur</b> | 164 | 13.41 | 23.54 | 9.78  | 17.04 |         |       |
|                        | <b>Kazak</b> | 630 | 7.81  | 8.67  | 7.14  | 8.49  |         |       |
| <b>2 hour</b>          | <b>Han</b>   | 600 | 52.17 | 50.60 | 48.12 | 56.23 | 107.390 | 0.000 |
| <b>Insulin</b>         | <b>Uygur</b> | 171 | 33.31 | 39.15 | 27.40 | 39.22 |         |       |
| <b>(mmol/L)</b>        | <b>Kazak</b> | 630 | 19.64 | 22.84 | 17.85 | 21.42 |         |       |
| <b>TC</b>              | <b>Han</b>   | 600 | 5.00  | 0.96  | 4.92  | 5.08  | 5.429   | 0.004 |
| <b>(mmol/L)</b>        | <b>Uygur</b> | 172 | 5.26  | 1.06  | 5.10  | 5.42  |         |       |
|                        | <b>Kazak</b> | 630 | 4.98  | 1.04  | 4.90  | 5.06  |         |       |
| <b>TG</b>              | <b>Han</b>   | 600 | 1.64  | 1.99  | 1.48  | 1.80  | 107.952 | 0.000 |
| <b>(mmol/L)</b>        | <b>Uygur</b> | 172 | 2.47  | 1.30  | 2.28  | 2.67  |         |       |
|                        | <b>Kazak</b> | 630 | 0.83  | 0.57  | 0.78  | 0.87  |         |       |
| <b>HDL</b>             | <b>Han</b>   | 600 | 1.39  | 0.30  | 1.37  | 1.42  | 292.661 | 0.000 |
| <b>(mmol/L)</b>        | <b>Uygur</b> | 172 | 1.18  | 0.34  | 1.13  | 1.23  |         |       |
|                        | <b>Kazak</b> | 630 | 1.67  | 0.21  | 1.65  | 1.69  |         |       |
| <b>LDL</b>             | <b>Han</b>   | 600 | 3.22  | 0.75  | 3.16  | 3.28  | 30.178  | 0.000 |
| <b>(mmol/L)</b>        | <b>Uygur</b> | 172 | 3.01  | 0.51  | 2.93  | 3.08  |         |       |
|                        | <b>Kazak</b> | 630 | 2.90  | 0.74  | 2.84  | 2.96  |         |       |

---

WC: waist circumference ;HC: hip circumference; WHR: waist-to-hip ratio ;BMI : Body mass index;  
 SBP: Systolic blood pressure; DBP: Diastolic blood pressure; HDL: High density lipoproteins; TG:  
 Triglycerides; TC: Cholesterol; LDL: Low density lipoproteins. Han (n=600); Uygur (n=172); Kazak

(n=630). Comparison between groups was used One-way analysis of variance (ANOVA). Values are given as the mean  $\pm$  SD.  $P < 0.01$ , the difference was statistically significant.

The levels of serum lipid (TC, TG, HDL, and LDL) were significantly correlated with height, weight, BMI, WC, HC, WHR, SBP, DBP, fasting plasma glucose, 2-hour plasma glucose, fasting insulin, and 2-hour insulin in Han and Kazak populations; while, interestingly, the correlations of serum lipid levels and other indices only reflected two relationships in the Uygur population: TC was positively correlated with height, and LDL was positively correlated with 2-hour plasma glucose. These results suggested that the high lipid levels might be mainly related to genetic factors in the Uygur population. The results were shown in the Table S8.

**Table S9 The Correlation of the main indexes**

| Ethnics         | Indexes                | Correlation | Height | Weight       | BMI          | WC           | HC           | WHR          | SBP          | DBP          | Fasting blood glucose | 2 hour plasma glucose | Fasting Insulin | 2 hour Insulin | TC           | TG           | HDL          | LDL          |
|-----------------|------------------------|-------------|--------|--------------|--------------|--------------|--------------|--------------|--------------|--------------|-----------------------|-----------------------|-----------------|----------------|--------------|--------------|--------------|--------------|
| Han             | Height                 | r           | 1.000  | 0.646        | 0.172        | 0.350        | 0.221        | 0.298        | 0.111        | 0.205        | 0.096                 | 0.095                 | 0.025           | 0.023          | 0.018        | 0.147        | -0.193       | 0.112        |
|                 |                        | p           |        | <b>0.000</b> | <b>0.000</b> | <b>0.000</b> | <b>0.000</b> | <b>0.000</b> | <b>0.000</b> | <b>0.006</b> | <b>0.000</b>          | <b>0.019</b>          | <b>0.020</b>    | 0.539          | 0.566        | 0.665        | <b>0.000</b> | <b>0.000</b> |
|                 | Weight                 | r           |        | 1.000        | 0.845        | 0.756        | 0.618        | 0.551        | 0.354        | 0.403        | 0.231                 | 0.255                 | 0.245           | 0.245          | 0.135        | 0.395        | -0.346       | 0.350        |
|                 |                        | p           |        |              | <b>0.000</b> | <b>0.000</b> | <b>0.000</b> | <b>0.000</b> | <b>0.000</b> | <b>0.000</b> | <b>0.000</b>          | <b>0.000</b>          | <b>0.000</b>    | <b>0.000</b>   | <b>0.000</b> | <b>0.001</b> | <b>0.000</b> | <b>0.000</b> |
|                 | BMI                    | r           |        |              | 1.000        | 0.742        | 0.669        | 0.502        | 0.391        | 0.389        | 0.231                 | 0.264                 | 0.321           | 0.308          | 0.173        | 0.421        | -0.313       | 0.392        |
|                 |                        | p           |        |              |              | <b>0.000</b> | <b>0.000</b> | <b>0.000</b> | <b>0.000</b> | <b>0.000</b> | <b>0.000</b>          | <b>0.000</b>          | <b>0.000</b>    | <b>0.000</b>   | <b>0.000</b> | <b>0.000</b> | <b>0.000</b> | <b>0.000</b> |
|                 | WC(cm)                 | r           |        |              |              | 1.000        | 0.582        | 0.851        | 0.436        | 0.411        | 0.350                 | 0.372                 | 0.283           | 0.240          | 0.201        | 0.450        | -0.325       | 0.400        |
|                 |                        | p           |        |              |              |              | <b>0.000</b> | <b>0.000</b> | <b>0.000</b> | <b>0.000</b> | <b>0.000</b>          | <b>0.000</b>          | <b>0.000</b>    | <b>0.000</b>   | <b>0.000</b> | <b>0.000</b> | <b>0.000</b> | <b>0.000</b> |
|                 | HC(cm)                 | r           |        |              |              |              | 1.000        | 0.115        | 0.254        | 0.270        | 0.199                 | 0.126                 | 0.282           | 0.142          | 0.066        | 0.233        | -0.163       | 0.200        |
|                 |                        | p           |        |              |              |              |              | <b>0.005</b> | <b>0.000</b> | <b>0.000</b> | <b>0.000</b>          | <b>0.000</b>          | <b>0.002</b>    | <b>0.000</b>   | <b>0.001</b> | <b>0.109</b> | <b>0.000</b> | <b>0.000</b> |
|                 | WHR                    | r           |        |              |              |              |              | 1.000        | 0.384        | 0.349        | 0.309                 | 0.390                 | 0.172           | 0.213          | 0.209        | 0.412        | -0.294       | 0.367        |
|                 |                        | p           |        |              |              |              |              |              | <b>0.000</b> | <b>0.000</b> | <b>0.000</b>          | <b>0.000</b>          | <b>0.000</b>    | <b>0.000</b>   | <b>0.000</b> | <b>0.000</b> | <b>0.000</b> | <b>0.000</b> |
|                 | SBP                    | r           |        |              |              |              |              |              | 1.000        | 0.635        | 0.249                 | 0.394                 | 0.182           | 0.197          | 0.223        | 0.333        | -0.136       | 0.319        |
|                 |                        | p           |        |              |              |              |              |              |              | <b>0.000</b> | <b>0.000</b>          | <b>0.000</b>          | <b>0.000</b>    | <b>0.000</b>   | <b>0.000</b> | <b>0.000</b> | <b>0.000</b> | <b>0.001</b> |
|                 | DBP                    | r           |        |              |              |              |              |              |              | 1.000        | 0.247                 | 0.315                 | 0.183           | 0.232          | 0.197        | 0.335        | -0.150       | 0.293        |
|                 |                        | p           |        |              |              |              |              |              |              |              | <b>0.000</b>          | <b>0.000</b>          | <b>0.000</b>    | <b>0.000</b>   | <b>0.000</b> | <b>0.000</b> | <b>0.000</b> | <b>0.000</b> |
|                 | Fasting plasma glucose | r           |        |              |              |              |              |              |              |              | 1.000                 | 0.559                 | 0.293           | 0.137          | 0.177        | 0.312        | -0.157       | 0.302        |
|                 |                        | p           |        |              |              |              |              |              |              |              |                       | <b>0.000</b>          | <b>0.000</b>    | <b>0.001</b>   | <b>0.000</b> | <b>0.000</b> | <b>0.000</b> | <b>0.000</b> |
|                 | 2 hour plasma glucose  | r           |        |              |              |              |              |              |              |              |                       | 1.000                 | 0.178           | 0.411          | 0.226        | 0.396        | -0.196       | 0.363        |
|                 |                        | p           |        |              |              |              |              |              |              |              |                       |                       | <b>0.000</b>    | <b>0.000</b>   | <b>0.000</b> | <b>0.000</b> | <b>0.000</b> | <b>0.000</b> |
| Fasting Insulin | r                      |             |        |              |              |              |              |              |              |              |                       | 1.000                 | 0.360           | 0.174          | 0.296        | -0.197       | 0.293        |              |
|                 | p                      |             |        |              |              |              |              |              |              |              |                       |                       | <b>0.000</b>    | <b>0.000</b>   | <b>0.000</b> | <b>0.000</b> | <b>0.000</b> |              |
| 2 hour          | r                      |             |        |              |              |              |              |              |              |              |                       |                       | 1.000           | 0.143          | 0.334        | -0.204       | 0.285        |              |
|                 | p                      |             |        |              |              |              |              |              |              |              |                       |                       |                 | <b>0.000</b>   | <b>0.000</b> | <b>0.000</b> | <b>0.000</b> |              |

|              |                               |   |       |              |              |              |              |              |              |              |              |              |              |              |              |              |              |              |
|--------------|-------------------------------|---|-------|--------------|--------------|--------------|--------------|--------------|--------------|--------------|--------------|--------------|--------------|--------------|--------------|--------------|--------------|--------------|
|              | <b>Insulin</b>                | p |       |              |              |              |              |              |              |              |              |              |              |              | <b>0.000</b> | <b>0.000</b> | <b>0.000</b> | <b>0.000</b> |
|              | <b>TC</b>                     | r |       |              |              |              |              |              |              |              |              |              |              |              | 1.000        | 0.430        | 0.229        | 0.739        |
|              |                               | p |       |              |              |              |              |              |              |              |              |              |              |              |              | <b>0.000</b> | <b>0.000</b> | <b>0.000</b> |
|              | <b>TG</b>                     | r |       |              |              |              |              |              |              |              |              |              |              |              |              | 1.000        | -0.319       | 0.771        |
|              |                               | p |       |              |              |              |              |              |              |              |              |              |              |              |              |              | <b>0.000</b> | <b>0.000</b> |
|              | <b>HDL</b>                    | r |       |              |              |              |              |              |              |              |              |              |              |              |              |              | 1.000        | -0.220       |
|              |                               | p |       |              |              |              |              |              |              |              |              |              |              |              |              |              |              | <b>0.000</b> |
| <b>Uygur</b> | <b>Height</b>                 | r | 1.000 | 0.739        | -0.123       | 0.304        | 0.159        | 0.252        | 0.107        | 0.063        | 0.101        | -0.013       | 0.156        | 0.025        | -0.177       | 0.030        | -0.042       | -0.052       |
|              |                               | p |       | <b>0.000</b> | 0.108        | <b>0.000</b> | <b>0.037</b> | <b>0.001</b> | 0.171        | 0.421        | 0.188        | 0.865        | <b>0.047</b> | 0.749        | <b>0.020</b> | 0.698        | 0.589        | 0.501        |
|              | <b>Weight</b>                 | r |       | 1.000        | 0.495        | 0.575        | 0.428        | 0.317        | 0.209        | 0.184        | 0.168        | 0.061        | 0.239        | 0.009        | -0.094       | 0.057        | 0.002        | -0.044       |
|              |                               | p |       |              | <b>0.000</b> | <b>0.000</b> | <b>0.000</b> | <b>0.000</b> | <b>0.007</b> | <b>0.018</b> | <b>0.028</b> | 0.424        | <b>0.002</b> | 0.911        | 0.220        | 0.461        | 0.978        | 0.567        |
|              | <b>BMI</b>                    | r |       |              | 1.000        | 0.437        | 0.422        | 0.147        | 0.186        | 0.197        | 0.098        | 0.118        | 0.234        | -0.031       | 0.053        | 0.131        | 0.003        | 0.051        |
|              |                               | p |       |              |              | <b>0.000</b> | <b>0.000</b> | 0.055        | <b>0.017</b> | <b>0.011</b> | 0.199        | 0.123        | <b>0.003</b> | 0.686        | 0.494        | 0.086        | 0.965        | 0.508        |
|              | <b>WC</b>                     | r |       |              |              | 1.000        | 0.665        | 0.591        | 0.126        | 0.172        | 0.165        | 0.074        | 0.237        | 0.039        | 0.128        | 0.117        | 0.065        | -0.008       |
|              |                               | p |       |              |              |              | <b>0.000</b> | <b>0.000</b> | 0.108        | <b>0.027</b> | <b>0.031</b> | 0.336        | <b>0.002</b> | 0.612        | 0.095        | 0.127        | 0.400        | 0.917        |
|              | <b>HC</b>                     | r |       |              |              |              | 1.000        | -0.137       | 0.010        | 0.090        | 0.117        | 0.166        | 0.198        | 0.073        | 0.040        | 0.065        | 0.067        | 0.071        |
|              |                               | p |       |              |              |              |              | 0.075        | 0.898        | 0.253        | 0.125        | <b>0.030</b> | <b>0.011</b> | 0.346        | 0.606        | 0.394        | 0.382        | 0.354        |
|              | <b>WHR</b>                    | r |       |              |              |              |              | 1.000        | 0.170        | 0.131        | 0.137        | -0.093       | 0.129        | -0.029       | 0.121        | 0.150        | -0.008       | -0.050       |
|              |                               | p |       |              |              |              |              |              | <b>0.029</b> | 0.093        | 0.075        | 0.227        | 0.101        | 0.704        | 0.114        | 0.050        | 0.915        | 0.519        |
|              | <b>SBP</b>                    | r |       |              |              |              |              |              | 1.000        | 0.864        | 0.115        | 0.140        | 0.116        | 0.107        | 0.153        | 0.101        | 0.142        | 0.021        |
|              |                               | p |       |              |              |              |              |              |              | <b>0.000</b> | 0.142        | 0.072        | 0.144        | 0.172        | 0.050        | 0.195        | 0.070        | 0.791        |
|              | <b>DBP</b>                    | r |       |              |              |              |              |              |              | 1.000        | 0.083        | 0.160        | 0.049        | 0.106        | 0.165        | 0.069        | 0.141        | -0.040       |
|              |                               | p |       |              |              |              |              |              |              |              | 0.289        | 0.040        | 0.541        | 0.175        | 0.034        | 0.376        | 0.070        | 0.613        |
|              | <b>Fasting plasma glucose</b> | r |       |              |              |              |              |              |              |              | 1.000        | 0.399        | 0.310        | 0.199        | 0.026        | 0.104        | 0.083        | 0.077        |
|              |                               | p |       |              |              |              |              |              |              |              |              | <b>0.000</b> | <b>0.000</b> | <b>0.009</b> | 0.732        | 0.177        | 0.282        | 0.315        |
|              | <b>2 hour plasma glucose</b>  | r |       |              |              |              |              |              |              |              |              | 1.000        | 0.182        | 0.564        | 0.087        | 0.138        | 0.132        | 0.196        |
|              |                               | p |       |              |              |              |              |              |              |              |              |              | <b>0.020</b> | <b>0.000</b> | 0.256        | 0.071        | 0.083        | <b>0.010</b> |
|              | <b>Fasting Insulin</b>        | r |       |              |              |              |              |              |              |              |              |              | 1.000        | 0.267        | 0.029        | 0.113        | 0.096        | 0.098        |
|              |                               | p |       |              |              |              |              |              |              |              |              |              |              | <b>0.001</b> | 0.714        | 0.149        | 0.224        | 0.211        |
|              | <b>2 hour Insulin</b>         | r |       |              |              |              |              |              |              |              |              |              |              | 1.000        | -0.009       | 0.103        | 0.065        | 0.148        |
|              |                               | p |       |              |              |              |              |              |              |              |              |              |              |              | 0.905        | 0.182        | 0.396        | 0.054        |
|              | <b>TC</b>                     | r |       |              |              |              |              |              |              |              |              |              |              |              | 1.000        | 0.230        | 0.243        | 0.221        |
|              |                               | p |       |              |              |              |              |              |              |              |              |              |              |              |              | <b>0.002</b> | <b>0.001</b> | <b>0.004</b> |
|              | <b>TG</b>                     | r |       |              |              |              |              |              |              |              |              |              |              |              |              | 1.000        | 0.030        | 0.270        |

|              |                               |   |       |              |              |              |              |              |              |              |              |              |              |              |              |              |              |              |              |
|--------------|-------------------------------|---|-------|--------------|--------------|--------------|--------------|--------------|--------------|--------------|--------------|--------------|--------------|--------------|--------------|--------------|--------------|--------------|--------------|
|              |                               |   |       |              |              |              |              |              |              |              |              |              |              |              |              |              |              | 0.699        | <b>0.000</b> |
|              | <b>HDL</b>                    | r |       |              |              |              |              |              |              |              |              |              |              |              |              |              |              | 1.000        | 0.040        |
|              |                               | p |       |              |              |              |              |              |              |              |              |              |              |              |              |              |              | .            | 0.605        |
| <b>Kazak</b> | <b>Height</b>                 | r | 1.000 | 0.440        | -0.024       | 0.101        | 0.081        | 0.098        | -0.026       | -0.051       | 0.018        | -0.085       | 0.064        | -0.126       | -0.021       | 0.091        | 0.023        | -0.053       |              |
|              |                               | p | .     | <b>0.000</b> | 0.551        | <b>0.011</b> | <b>0.042</b> | <b>0.014</b> | 0.513        | 0.202        | 0.648        | <b>0.032</b> | 0.108        | <b>0.002</b> | 0.599        | <b>0.022</b> | 0.568        | 0.182        |              |
|              | <b>Weight</b>                 | r |       | 1.000        | 0.869        | 0.767        | 0.792        | 0.492        | 0.283        | 0.305        | 0.083        | 0.185        | 0.232        | 0.146        | 0.214        | 0.431        | 0.220        | 0.136        |              |
|              |                               | p |       | .            | <b>0.000</b> | <b>0.000</b> | <b>0.000</b> | <b>0.000</b> | <b>0.000</b> | <b>0.000</b> | <b>0.038</b> | <b>0.000</b> | <b>0.000</b> | <b>0.000</b> | <b>0.000</b> | <b>0.000</b> | <b>0.000</b> | <b>0.001</b> |              |
|              | <b>BMI</b>                    | r |       |              | 1.000        | 0.811        | 0.840        | 0.516        | 0.338        | 0.378        | 0.085        | 0.242        | 0.230        | 0.227        | 0.270        | 0.437        | 0.242        | 0.194        |              |
|              |                               | p |       |              | .            | <b>0.000</b> | <b>0.000</b> | <b>0.000</b> | <b>0.000</b> | <b>0.000</b> | <b>0.034</b> | <b>0.000</b> | <b>0.000</b> | <b>0.000</b> | <b>0.000</b> | <b>0.000</b> | <b>0.000</b> | <b>0.000</b> | <b>0.000</b> |
|              | <b>WC</b>                     | r |       |              |              | 1.000        | 0.829        | 0.823        | 0.387        | 0.402        | 0.080        | 0.267        | 0.148        | 0.222        | 0.316        | 0.462        | 0.334        | 0.244        |              |
|              |                               | p |       |              |              | .            | <b>0.000</b> | <b>0.000</b> | <b>0.000</b> | <b>0.000</b> | <b>0.044</b> | <b>0.000</b> | <b>0.000</b> | <b>0.000</b> | <b>0.000</b> | <b>0.000</b> | <b>0.000</b> | <b>0.000</b> | <b>0.000</b> |
|              | <b>HC</b>                     | r |       |              |              |              | 1.000        | 0.394        | 0.275        | 0.324        | 0.109        | 0.240        | 0.176        | 0.194        | 0.252        | 0.385        | 0.245        | 0.205        |              |
|              |                               | p |       |              |              |              | .            | <b>0.000</b> | <b>0.000</b> | <b>0.000</b> | <b>0.006</b> | <b>0.000</b> | <b>0.000</b> | <b>0.000</b> | <b>0.000</b> | <b>0.000</b> | <b>0.000</b> | <b>0.000</b> | <b>0.000</b> |
|              | <b>WHR</b>                    | r |       |              |              |              |              | 1.000        | 0.371        | 0.347        | 0.020        | 0.202        | 0.063        | 0.157        | 0.279        | 0.391        | 0.304        | 0.199        |              |
|              |                               | p |       |              |              |              |              | .            | <b>0.000</b> | <b>0.000</b> | 0.616        | <b>0.000</b> | 0.116        | <b>0.000</b> | <b>0.000</b> | <b>0.000</b> | <b>0.000</b> | <b>0.000</b> | <b>0.000</b> |
|              | <b>SBP</b>                    | r |       |              |              |              |              |              | 1.000        | 0.773        | -0.002       | 0.237        | 0.052        | 0.151        | 0.325        | 0.307        | 0.325        | 0.255        |              |
|              |                               | p |       |              |              |              |              |              | .            | <b>0.000</b> | 0.965        | <b>0.000</b> | 0.191        | <b>0.000</b> | <b>0.000</b> | <b>0.000</b> | <b>0.000</b> | <b>0.000</b> | <b>0.000</b> |
|              | <b>DBP</b>                    | r |       |              |              |              |              |              |              | 1.000        | 0.061        | 0.192        | 0.126        | 0.204        | 0.311        | 0.308        | 0.303        | 0.255        |              |
|              |                               | p |       |              |              |              |              |              |              | .            | 0.126        | <b>0.000</b> | <b>0.002</b> | <b>0.000</b> | <b>0.000</b> | <b>0.000</b> | <b>0.000</b> | <b>0.000</b> | <b>0.000</b> |
|              | <b>Fasting plasma glucose</b> | r |       |              |              |              |              |              |              |              | 1.000        | 0.363        | 0.121        | 0.186        | 0.131        | 0.149        | 0.023        | 0.119        |              |
|              |                               | p |       |              |              |              |              |              |              |              | .            | <b>0.000</b> | <b>0.002</b> | <b>0.000</b> | <b>0.001</b> | <b>0.000</b> | 0.568        | <b>0.003</b> |              |
|              | <b>2 hour plasma glucose</b>  | r |       |              |              |              |              |              |              |              |              | 1.000        | 0.113        | 0.375        | 0.197        | 0.212        | 0.119        | 0.159        |              |
|              |                               | p |       |              |              |              |              |              |              |              |              | .            | <b>0.004</b> | <b>0.000</b> | <b>0.000</b> | <b>0.000</b> | <b>0.003</b> | <b>0.000</b> |              |
|              | <b>Fasting Insulin</b>        | r |       |              |              |              |              |              |              |              |              |              | 1.000        | 0.361        | 0.109        | 0.211        | 0.015        | 0.063        |              |
|              |                               | p |       |              |              |              |              |              |              |              |              |              | .            | <b>0.000</b> | <b>0.006</b> | <b>0.000</b> | 0.710        | 0.115        |              |
|              | <b>2 hour Insulin</b>         | r |       |              |              |              |              |              |              |              |              |              |              | 1.000        | 0.161        | 0.216        | 0.069        | 0.148        |              |
|              |                               | p |       |              |              |              |              |              |              |              |              |              |              | .            | <b>0.000</b> | <b>0.000</b> | 0.086        | <b>0.000</b> |              |
|              | <b>TC</b>                     | r |       |              |              |              |              |              |              |              |              |              |              |              | 1.000        | 0.411        | 0.639        | 0.893        |              |
|              |                               | p |       |              |              |              |              |              |              |              |              |              |              |              | .            | <b>0.000</b> | <b>0.000</b> | <b>0.000</b> |              |
|              | <b>TG</b>                     | r |       |              |              |              |              |              |              |              |              |              |              |              |              | 1.000        | 0.327        | 0.252        |              |
|              |                               | p |       |              |              |              |              |              |              |              |              |              |              |              |              | .            | <b>0.000</b> | <b>0.000</b> |              |
|              | <b>HDL</b>                    | r |       |              |              |              |              |              |              |              |              |              |              |              |              |              | 1.000        | 0.584        |              |
|              |                               | p |       |              |              |              |              |              |              |              |              |              |              |              |              |              |              |              | <b>0.000</b> |

Spearman analysis,  $P < 0.01$ ,  $P < 0.05$ . The difference between the two groups has statistical significance.
